# Supplementary material
Source: PubMed Central journal article supplement (PMC4936414)
Supplement: NIHMS797091-supplement-1.pdf [file NIHMS797091-supplement-1.pdf]

## Supplementary Online Content

Culyba AJ, Jacoby SF, Richmond TS, Fein JA, Hohl BC, Branas CC. Modifiable neighborhood features associated with adolescent homicide. *JAMA Pediatr*. Published online March 7, 2016. doi:10.1001/jamapediatrics.2015.4697.

**eFigure 1.** Original and Stitched Panorama Photographs and Example Environmental Codings From a Sample Location

**eFigure 2.** Location of Adolescent Outdoor Homicide Case and Matched Control Participants, Philadelphia, PA, 2010-2012

**eTable.** Pictometry Coding Guide

This supplementary material has been provided by the authors to give readers additional information about their work.

**eFigure 1.** Original and Stitched Panorama Photographs and Example Environmental Codings From a Sample Location\*

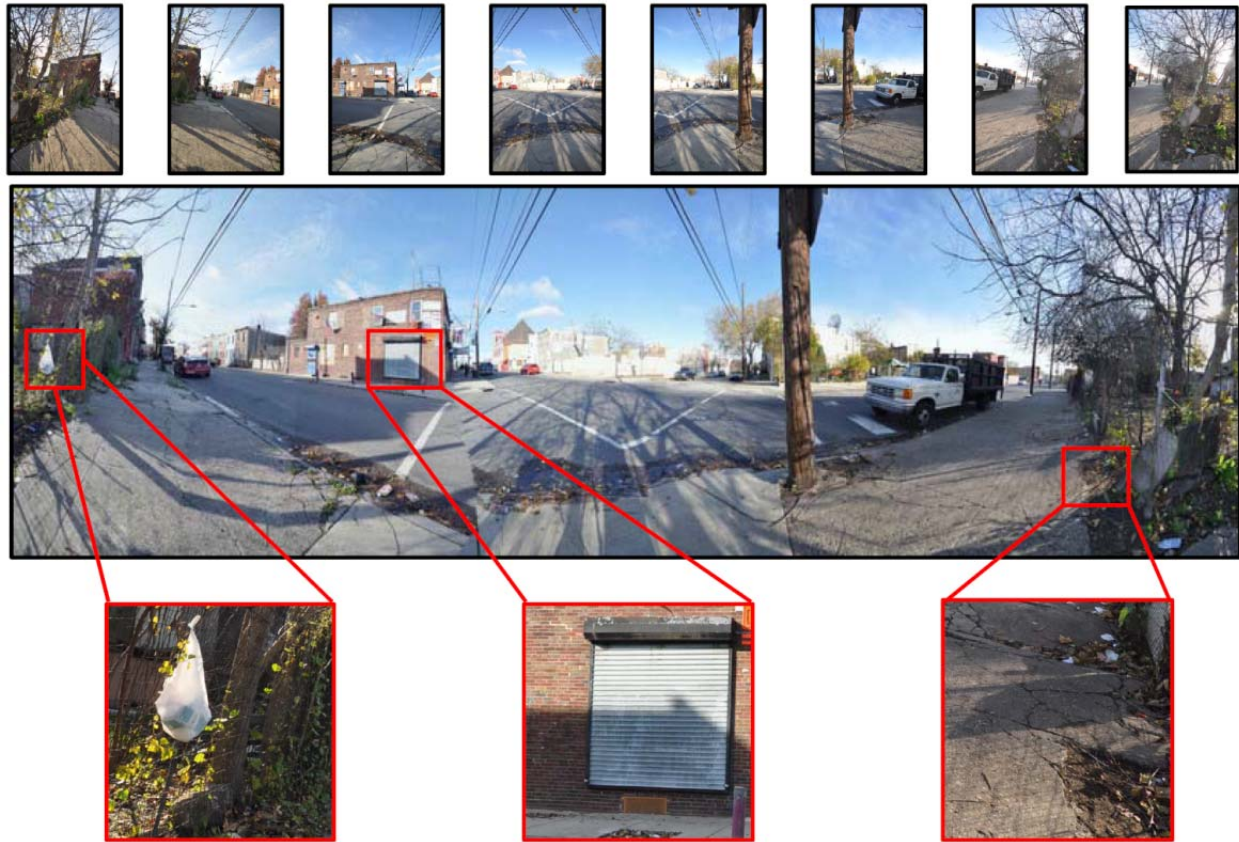

1. Trash

2. Pull-down metal fencing

3. Sidewalk condition

\* This location is presented only to illustrate the study's methods and is not an actual location of a study participant

**eFigure 2.** Location of Adolescent Outdoor Homicide Case and Matched Control Participants, Philadelphia, PA, 2010-2012

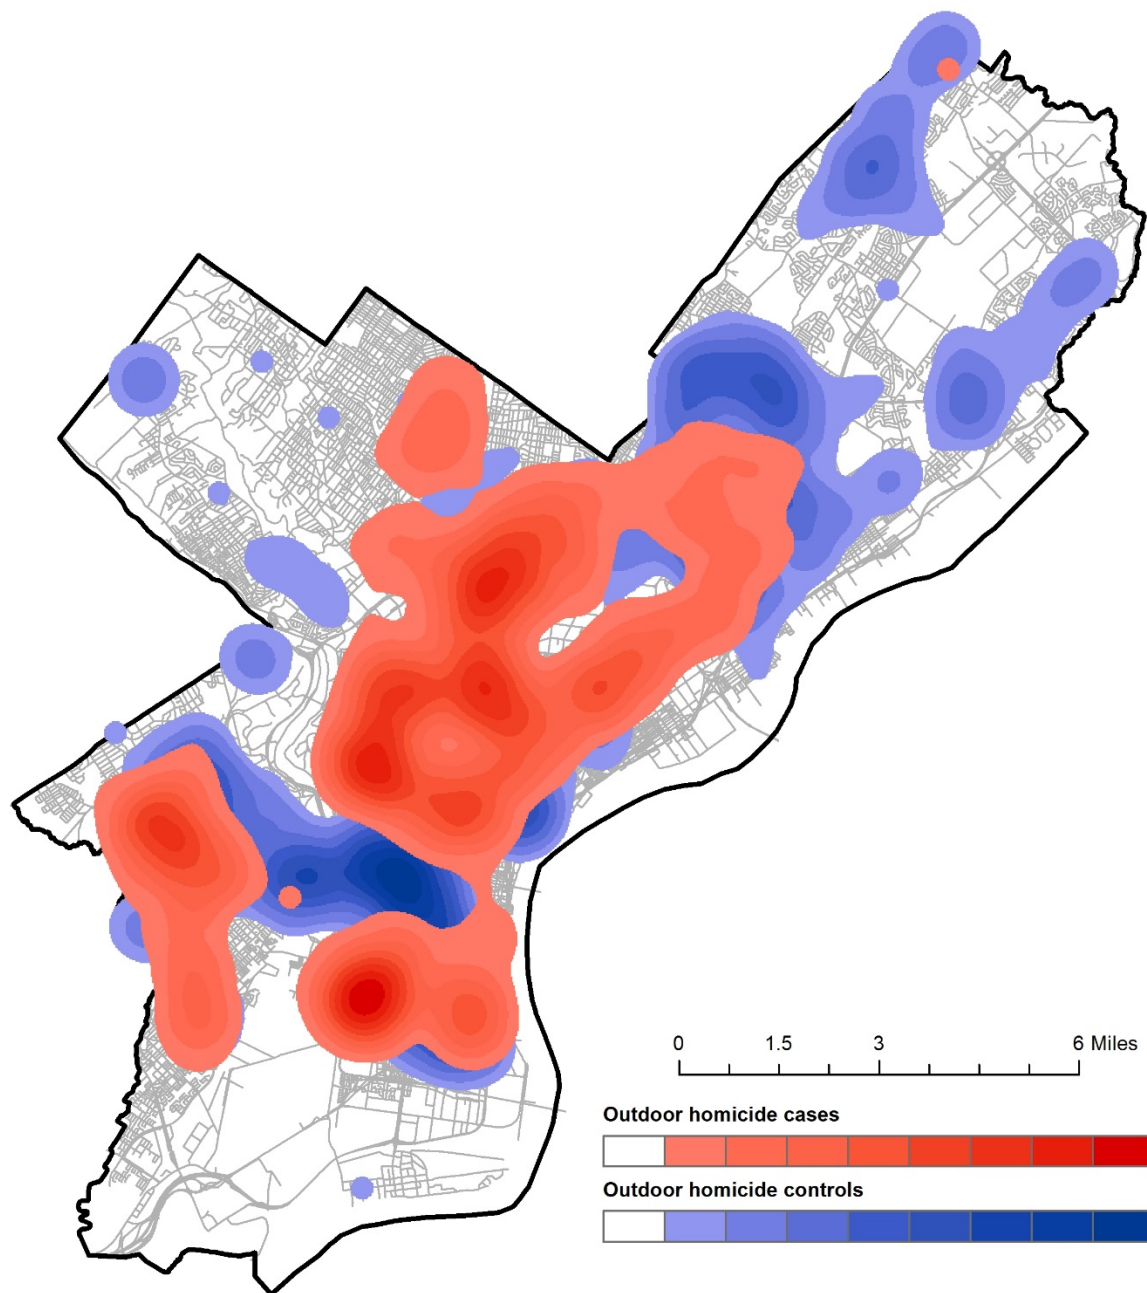

**eTable.** Pictometry Coding Guide

| <b>Street Conditions</b>                        |                                                                                                                |
|-------------------------------------------------|----------------------------------------------------------------------------------------------------------------|
| Trash                                           | 1 – No trash                                                                                                   |
|                                                 | 2 – Minimal trash/littering (1-3 pieces)                                                                       |
|                                                 | 3 – Moderate trash/littering (4-10 pieces)                                                                     |
|                                                 | 4 – Heavy or extensive trash/littering (more than 10 pieces but no large objects like appliances or furniture) |
|                                                 | 5 – Extreme trash/dumping (large items like appliances, tires, or furniture)                                   |
|                                                 | <i>Combining categories for analysis: 1-2 vs. 3-5</i>                                                          |
| Street Lights                                   | 1 – None                                                                                                       |
|                                                 | 2 – At least 1                                                                                                 |
| Illuminated walk/don't walk signs               | 1 – None                                                                                                       |
|                                                 | 2 – At least 1                                                                                                 |
| Painted Crosswalks                              | 1 – None                                                                                                       |
|                                                 | 2 – At least 1                                                                                                 |
| Stop Signs                                      | 1 – None                                                                                                       |
|                                                 | 2 – At least 1                                                                                                 |
| Public Transportation available/visible         | 1 – No                                                                                                         |
| (i.e. trolley, bus, subway, tracks, or signage) | 2 – Yes                                                                                                        |
| Sidewalk condition                              | 1 – Excellent (smooth, even, well-maintained, with unbroken concrete or bricks)                                |
|                                                 | 2 – Good (well maintained, with no broken concrete or bricks, but lopsided)                                    |
|                                                 | 3 – Fair (One or two missing sections concrete or bricks, or other tripping hazards; unsightly)                |
|                                                 | 4 – Poor (3 or more tripping hazards, multiple sections of broken or missing bricks or concrete)               |
|                                                 | 5 – Very poor (Unsound, not passable)                                                                          |
|                                                 | <i>Combining categories for analysis: 1 vs. 2 vs. 3 vs. 4-5</i>                                                |

|                                                                                             |                                                                                                                               |
|---------------------------------------------------------------------------------------------|-------------------------------------------------------------------------------------------------------------------------------|
| Street Type                                                                                 | 1 – One lane (one-way street)                                                                                                 |
| (answer based on the street with the most lanes at the study intersection)                  | 2 – Two lanes (one-way street)                                                                                                |
|                                                                                             | 3 – More than two lanes (one-way street)                                                                                      |
|                                                                                             | 4 – Two lanes (two-way street)                                                                                                |
|                                                                                             | 5 – More than two lanes (two-way street)                                                                                      |
|                                                                                             | <i>Note: no locations were coded as 5 in the study sample</i>                                                                 |
| <b>Building Conditions</b>                                                                  |                                                                                                                               |
| Property type                                                                               | 1 – Exclusively residential                                                                                                   |
|                                                                                             | 2 – Primarily residential                                                                                                     |
|                                                                                             | 3 – Equal mix residential and commercial/municipal                                                                            |
|                                                                                             | 4 – Primarily commercial/municipal                                                                                            |
|                                                                                             | 5 – Exclusively commercial/municipal                                                                                          |
|                                                                                             | Municipal/institutional – includes schools, churches, hospitals or medical facilities, nursing homes, community centers, etc. |
|                                                                                             | Commercial – includes private enterprise of any kind, such as retail establishments, businesses, food outlets, etc.           |
|                                                                                             | Residential – includes private homes or apartment buildings                                                                   |
|                                                                                             | <i>Combining categories for analysis: 1-2 vs. 3 vs. 4-5</i>                                                                   |
| Detached houses                                                                             | 1 – None                                                                                                                      |
|                                                                                             | 2 – At least 1                                                                                                                |
| Attached/row homes                                                                          | 1 – None                                                                                                                      |
|                                                                                             | 2 – At least 1                                                                                                                |
| Housing over storefronts                                                                    | 1 – None                                                                                                                      |
|                                                                                             | 2 – At least 1                                                                                                                |
| Building structural condition                                                               | 1 – Very well kept (clearly maintained with no visible signs of deterioration)                                                |
| (Assessed separately for each property type: Commercial, Residential, Municipal, Religious) | 2 – Moderately well kept (Minimal deterioration present, including peeling paint or surface damage)                           |

|                                                                                                                                                                                                                             |                                                                                                                                                                                                                                                                                                                                                                                                                                                                                   |
|-----------------------------------------------------------------------------------------------------------------------------------------------------------------------------------------------------------------------------|-----------------------------------------------------------------------------------------------------------------------------------------------------------------------------------------------------------------------------------------------------------------------------------------------------------------------------------------------------------------------------------------------------------------------------------------------------------------------------------|
|                                                                                                                                                                                                                             | 3 – Fairly well kept (some likely structural issues that go beyond surface cosmetic concerns)                                                                                                                                                                                                                                                                                                                                                                                     |
| If only one building within a property type is visible, base the rating on that single building. If several buildings within one property type are visible, report the average condition across all buildings of that type. | 4 – Poor (Structure seriously deteriorated, perhaps in danger of collapse)                                                                                                                                                                                                                                                                                                                                                                                                        |
|                                                                                                                                                                                                                             | N/A – Property type not present                                                                                                                                                                                                                                                                                                                                                                                                                                                   |
|                                                                                                                                                                                                                             | <i>A given 360-degree panorama could contain anywhere from 1-4 of these different property types. We used the 4 building condition variables (Commercial, Residential, Municipal, and Religious) to create a mean building condition variable that averaged the scores of the property types present in the image, giving equal weight to each property type present. Mean building condition ranges from 1-4 and uses the same definitions listed above as reference points.</i> |
| Broken/boarded up windows                                                                                                                                                                                                   | 1 – No visible broken or boarded windows or doors                                                                                                                                                                                                                                                                                                                                                                                                                                 |
|                                                                                                                                                                                                                             | 2 – One visible broken or boarded window or door                                                                                                                                                                                                                                                                                                                                                                                                                                  |
|                                                                                                                                                                                                                             | 3 – Multiple visible broken or boarded windows or doors                                                                                                                                                                                                                                                                                                                                                                                                                           |
| Security bars/gratings on houses                                                                                                                                                                                            | 1 – On none of the houses/apartments                                                                                                                                                                                                                                                                                                                                                                                                                                              |
|                                                                                                                                                                                                                             | 2 – On a few houses/apartments                                                                                                                                                                                                                                                                                                                                                                                                                                                    |
|                                                                                                                                                                                                                             | 3 – On about half of houses/apartments                                                                                                                                                                                                                                                                                                                                                                                                                                            |
|                                                                                                                                                                                                                             | 4 – On almost all houses/apartments                                                                                                                                                                                                                                                                                                                                                                                                                                               |
|                                                                                                                                                                                                                             | N/A – No houses/apartments are visible                                                                                                                                                                                                                                                                                                                                                                                                                                            |
|                                                                                                                                                                                                                             | <i>Combining categories for analysis: 1 vs. 2-4</i>                                                                                                                                                                                                                                                                                                                                                                                                                               |
| Security bars/gratings on business                                                                                                                                                                                          | 1 – On none of businesses                                                                                                                                                                                                                                                                                                                                                                                                                                                         |
|                                                                                                                                                                                                                             | 2 – On a few businesses                                                                                                                                                                                                                                                                                                                                                                                                                                                           |
|                                                                                                                                                                                                                             | 3 – On about half of businesses                                                                                                                                                                                                                                                                                                                                                                                                                                                   |
|                                                                                                                                                                                                                             | 4 – On almost all businesses                                                                                                                                                                                                                                                                                                                                                                                                                                                      |
|                                                                                                                                                                                                                             | N/A – No commercial establishments are visible                                                                                                                                                                                                                                                                                                                                                                                                                                    |
|                                                                                                                                                                                                                             | <i>Combining categories for analysis: 1 vs. 2-4</i>                                                                                                                                                                                                                                                                                                                                                                                                                               |
| Pull-down metal fencing on business                                                                                                                                                                                         | 1 – 0%                                                                                                                                                                                                                                                                                                                                                                                                                                                                            |
|                                                                                                                                                                                                                             | 2 – Only a few (1-10%)                                                                                                                                                                                                                                                                                                                                                                                                                                                            |
|                                                                                                                                                                                                                             | 3 – Fewer than half (11-49%)                                                                                                                                                                                                                                                                                                                                                                                                                                                      |
|                                                                                                                                                                                                                             | 4 – Most (50-89%)                                                                                                                                                                                                                                                                                                                                                                                                                                                                 |
|                                                                                                                                                                                                                             | 5 – Almost all (90% or more)                                                                                                                                                                                                                                                                                                                                                                                                                                                      |

|                                                                                                                                 |                                                                                                                                                     |
|---------------------------------------------------------------------------------------------------------------------------------|-----------------------------------------------------------------------------------------------------------------------------------------------------|
|                                                                                                                                 | N/A – No commercial establishments are visible                                                                                                      |
|                                                                                                                                 | <i>Combining categories for analysis: 1-2 vs. 3-5</i>                                                                                               |
| Security fences                                                                                                                 | 1 – None                                                                                                                                            |
|                                                                                                                                 | 2 – At least 1                                                                                                                                      |
| Furniture on street, sidewalk, porch                                                                                            | 1 – None                                                                                                                                            |
|                                                                                                                                 | 2 – At least 1 visible item                                                                                                                         |
| Murals                                                                                                                          | 1 – None                                                                                                                                            |
|                                                                                                                                 | 2 – At least 1                                                                                                                                      |
| Graffiti                                                                                                                        | 1 – No visible graffiti                                                                                                                             |
|                                                                                                                                 | 2 – Evidence of cleaned up graffiti                                                                                                                 |
|                                                                                                                                 | 3 – Small amount – for example, 1 tag on a stop sign or wall, covering less than 2x2 feet                                                           |
|                                                                                                                                 | 4 – Moderate amount – for example, 1 large area of graffiti not bigger than 5x5 feet (but bigger than 2x2 feet); or two + smaller areas of 2x2 feet |
|                                                                                                                                 | 5 – Extensive amount, covering more than 5x5 feet in any one location                                                                               |
|                                                                                                                                 | <i>Combining categories for analysis: 1 vs. 2-5</i>                                                                                                 |
| <b>Natural Surroundings</b>                                                                                                     |                                                                                                                                                     |
| Park                                                                                                                            | 1 – No parks present in photo                                                                                                                       |
| (defined as open space designed for public use, possibly with benches or tables, but not with play equipment or playing fields) | 2 – 1 park present in photo                                                                                                                         |
|                                                                                                                                 | 3 – More than 1 park present in photo                                                                                                               |
|                                                                                                                                 | <i>Combining categories for analysis: 1 vs. 2-3</i>                                                                                                 |
| Playground                                                                                                                      | 1 – No playground present in photo                                                                                                                  |
| (defined as open space designed with play equipment or playing fields)                                                          | 2 – 1 playground present in photo                                                                                                                   |
|                                                                                                                                 | 3 – More than 1 playground present in photo                                                                                                         |
|                                                                                                                                 | <i>Combining categories for analysis: 1 vs. 2-3</i>                                                                                                 |
| Neglected vacant lot                                                                                                            | 1 – None                                                                                                                                            |
| (defined as poorly tended (overgrown grass, excessive trash))                                                                   | 2 – At least 1                                                                                                                                      |

|                                                                                                                |                                                                 |
|----------------------------------------------------------------------------------------------------------------|-----------------------------------------------------------------|
| Maintained vacant lot                                                                                          | 1 – None                                                        |
| (defined as moderately well-tended (overgrown grass, minimal trash) to very well-tended (cut grass, no trash)) | 2 – At least 1                                                  |
| Planted trees                                                                                                  | 1 – Densely planted with 10 or more trees visible               |
|                                                                                                                | 2 – Moderately planted, with 5 to 9 trees visible               |
|                                                                                                                | 3 – Sparsely planted, with 2 to 4 trees planted                 |
|                                                                                                                | 4 – Only one tree                                               |
|                                                                                                                | 5 – No trees visible                                            |
|                                                                                                                | <i>Combining categories for analysis: 1-2 vs. 3-5</i>           |
| Public bushes or plantings                                                                                     | 1 – Dense presence of bushes – 10 or more bushes                |
| (i.e. located in parks, vacant lots)                                                                           | 2 – Multiple plantings – 2 to 9 bushes or (non)flowering plants |
|                                                                                                                | 3 – Single bush or (non)flowering plant                         |
|                                                                                                                | 4 – No visible bushes or plantings                              |
|                                                                                                                | N/A – No public spaces in picture                               |
|                                                                                                                | <i>Combining categories for analysis: 1-3 vs. 4</i>             |
| Private bushes or plantings                                                                                    | 1 – Dense presence of bushes – 10 or more bushes                |
| (i.e. located adjacent to residences)                                                                          | 2 – Multiple plantings – 2 to 9 bushes or (non)flowering plants |
|                                                                                                                | 3 – Single bush or (non)flowering plant                         |
|                                                                                                                | 4 – No visible bushes or plantings                              |
|                                                                                                                | N/A –No private or residential spaces in picture                |
|                                                                                                                | <i>Combining categories for analysis: 1-3 vs. 4</i>             |
